# Supplementary material for: Activation of Oxytocin Neurons Improves Cardiac Function in a Pressure-Overload Model of Heart Failure
Source: PubMed Central journal article supplement — JACC Basic Transl Sci. 2020 May 25;5(5):484–97. doi: 10.1016/j.jacbts.2020.03.007 (PMC7251188; doi:10.1016/j.jacbts.2020.03.007), 2020-05-25
Supplement: mmc1.pdf [file mmc1.pdf]

# SUPPLEMENTAL MATERIAL

## Supplementary Figure 1

Dyavanapalli J, et al

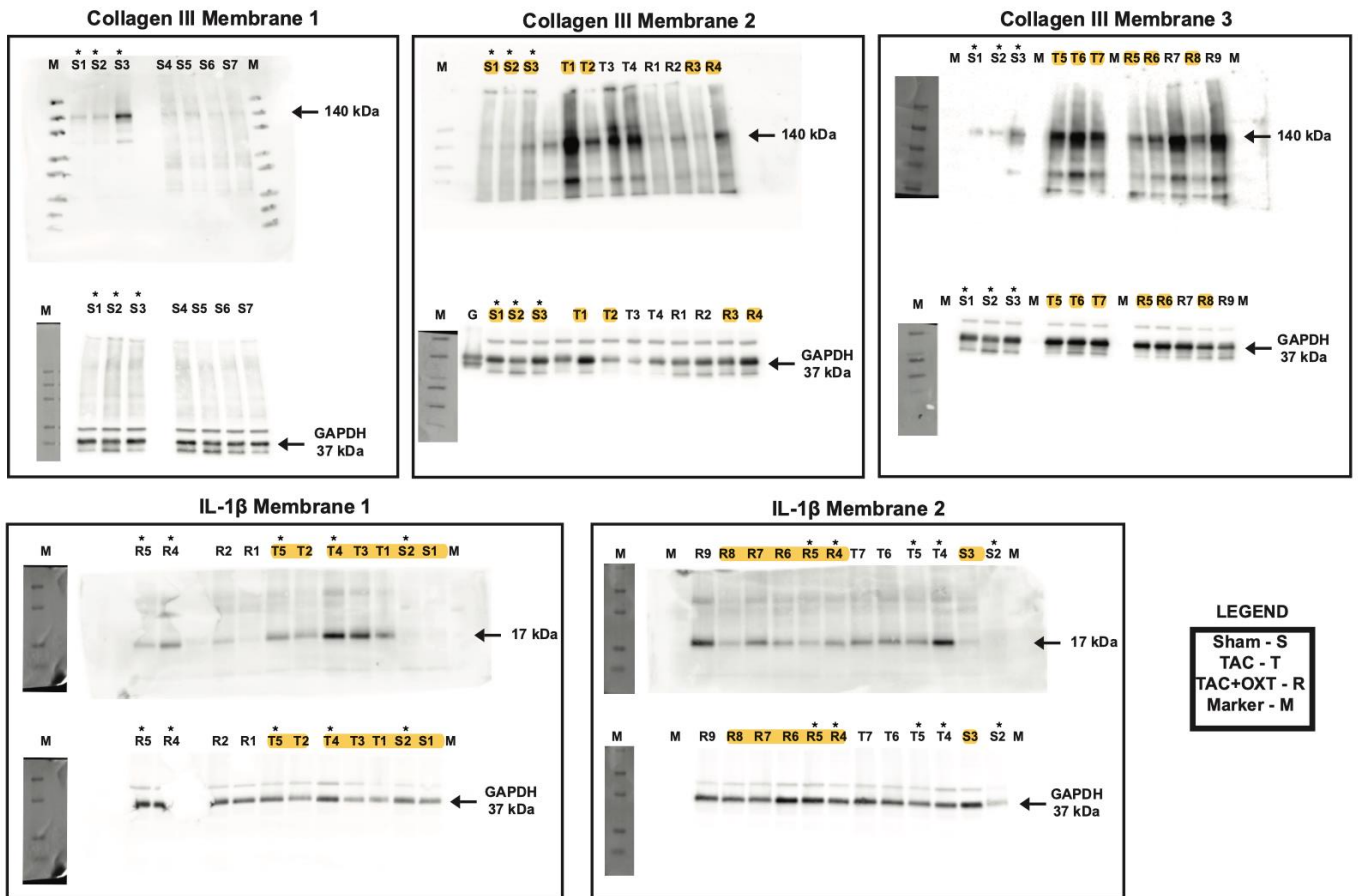

**Supplemental Fig 1:** Normalization of samples

Due to the large number of animals in each group, not all samples could be loaded on the same gel. We therefore ran 2-3 gels per target protein (IL-1β & col III) and included samples from

each of the 3 groups (Sham, TAC, TAC + OXT) on each gel, and repeated selected samples (indicated by asterisks) on each gel. We then normalized signal intensity between membranes based on the repeated sample expression. For housekeeping normalization, the collagen III gels were cut along the ~50 kDa mark and the upper portion was probed for col III (140 kDa) and the lower portion probed for GAPDH (37 kDa). Since IL-1  $\beta$  and GAPDH have similar molecular weights, gels were first probed for IL-1b (17kDa), then stripped and probed for GAPDH (37 kDa). This method provides consistent normalization of all samples both within each set and across the minimum number of required gels.
